# Supplementary material
Source: PubMed Central journal article supplement (PMC4259197)
Supplement: Supp_Fig1.pdf [file Supp_Fig1.pdf]

## Supplementary Data

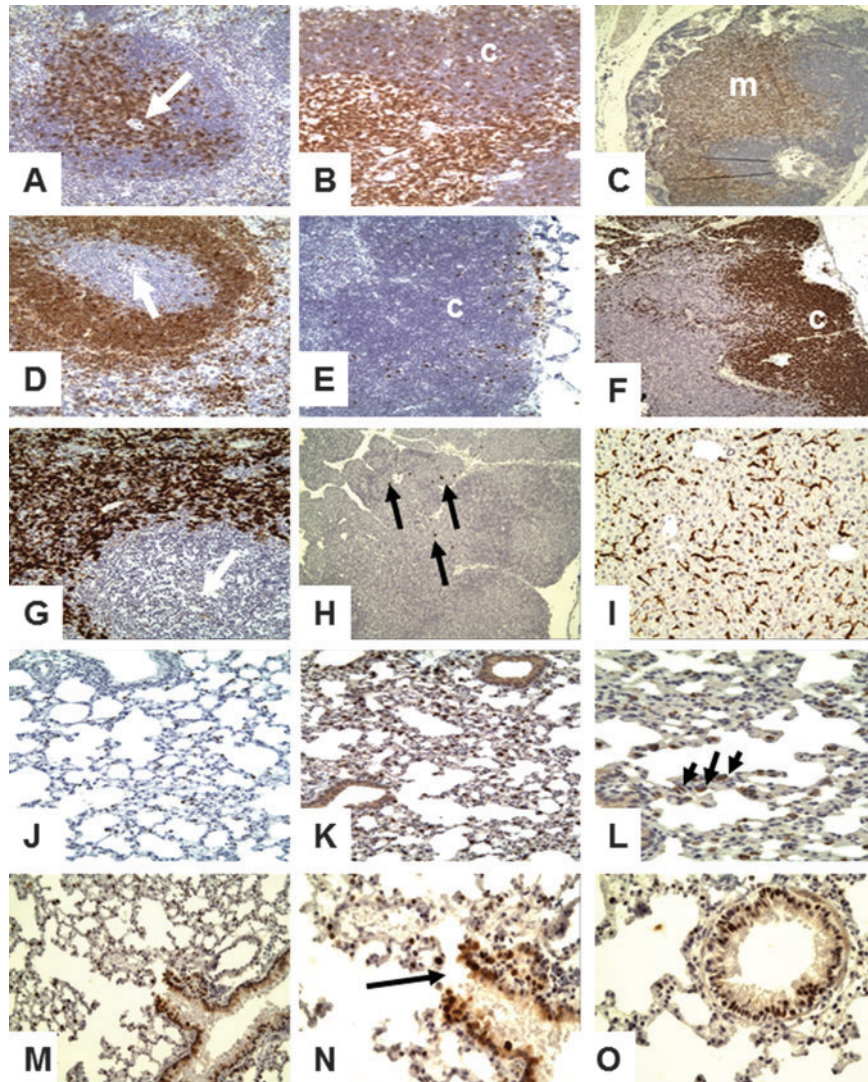

**SUPPLEMENTARY FIG. S1.** Immunoperoxidase staining of controls. (A–C) CD3, 20 $\times$ . (A) Spleen, (B) thymus, (C) pulmonary lymph node; (D–F) Pax5, 20 $\times$ . (D) Spleen, (E) thymus, (F) pulmonary lymph node; (G–H) F4/80. (G) Spleen, 20 $\times$ ; (H) pulmonary lymph node, 10 $\times$ ; (I) liver, 20 $\times$ . *Arrows* in (A), (D) and (G) point to central arteriole of white pulp. *Arrow* in (H) points to labeled cells in medulla of lymph node. (J–L) Protein C (surfactant) Lung. (J) 20 $\times$ , (K) 20 $\times$ , (L) 40 $\times$ , *arrows* in (L) point to small cuboidal cells in alveolar walls. Labeled type II pneumocytes; (M–O) TTF. Lung (M) 20 $\times$ , (N) 40 $\times$ , (O) 40 $\times$ . *Arrow* points to terminal bronchiole. c, cortex; m, medulla. CD3 labels T-cell zones of spleen (periarteriolar sheath), thymus and lymph node; Pax5 labels B-cell zones: mantle and marginal zone of splenic white pulp, cortex of lymph node, and very few subcortical cells in thymus. F4/80 labels cells in red pulp of spleen, a few cells in medulla of lymph node, and Kupffer cells in the liver, but does not label cells in lymph node cortex. Protein C labels stains type II pneumocytes and TTF stains bronchial epithelial cells. TTF, thyroid transcription factor.
