# Supplementary material
Source: PubMed Central journal article supplement (PMC4259197)
Supplement: Supp_Fig2.pdf [file Supp_Fig2.pdf]

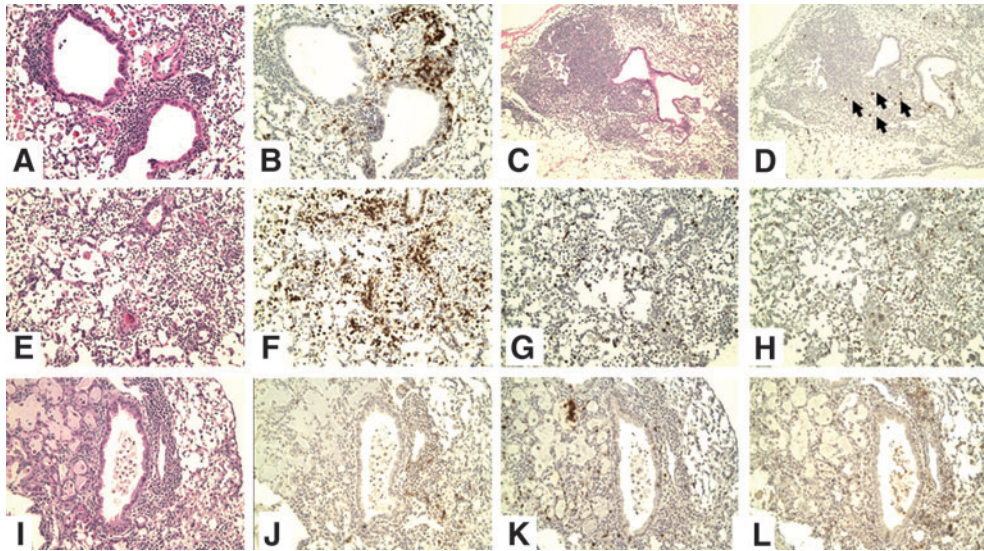

**SUPPLEMENTARY FIG. S2.** Labeling with F4/80 (macrophages). **(A–H)** Wild-type mouse at 90 days after IAV sensitization and 7 days after challenge. **(A)** H&E, 20 $\times$ ; **(B)** F4/80, 20 $\times$ . There is labeling of perivascular mononuclear cells but much less of peribronchiolar cells. **(C)** H&E 10 $\times$ ; **(D)** F4/80, BALT area showing a few macrophages (*arrows*) at periphery of BALT. No F4/80 cells were seen in BALT zones. **(E–H)** 20 $\times$ . Area of diffuse inflammation. **(E)** H&E, **(F)** F4/80, **(G)** Pax5, **(H)** CD3. This is one of a very few areas with diffuse alveolar inflammation that stains for F4/80. In this focus, there is a predominance of macrophages **(F)**, with fewer B-cells **(G)** and T-cells **(H)**. **(I–J)** Mouse treated with PC61 at 10 days after infection. Scattered F4/80 cells are present in the perivascular infiltrate but not in areas of epithelial proliferation **(J)**. There are very few B-cells **(K)** but many T-cells **(L)** in the perivascular inflammation. IAV, influenza A virus.
