# Supplementary material
Source: PubMed Central journal article supplement (PMC4259197)
Supplement: Supp_Fig3.pdf [file Supp_Fig3.pdf]

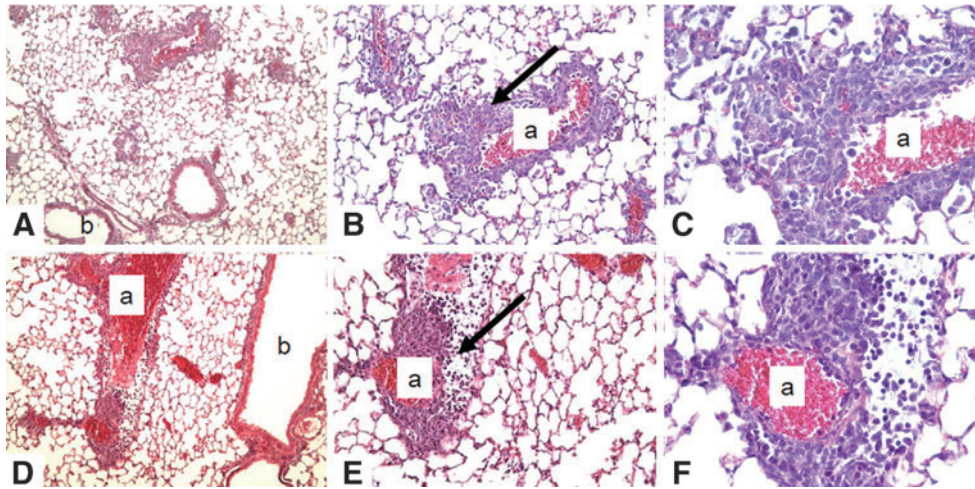

**SUPPLEMENTARY FIG. S3.** Hematoxylin and eosin-stained slides from mice receiving CD4 memory T-cell for OVA and challenged intranasally with OVA. (A–C, D–F) 10, 20, and 40 $\times$  of two recipient mice. There is marked perivascular infiltration of mononuclear cells but little or no involvement of bronchi or bronchioles. For example, see (A) and (D) where there is extensive perivascular infiltration with mononuclear cells (a), but no peribronchial inflammation. The *arrows* point to the perivascular space. a, artery; b, bronchus. Since these mice were transplanted with CD4 memory T-cells for OVA, and are examined 2 days after challenge, the infiltrating cells have to be CD4 T-cells. OVA, ovalbumin.
